# Supplementary material for: Immobilization of HSA on polyamidoamine-dendronized magnetic microspheres for application in direct chiral separation of racemates
Source: Royal Society of Chemistry journal article supplement (doi:10.1039/c3tb21340d), 2013-11-28
Supplement: c3tb21340d.pdf [file c3tb21340d.pdf]

## Support information

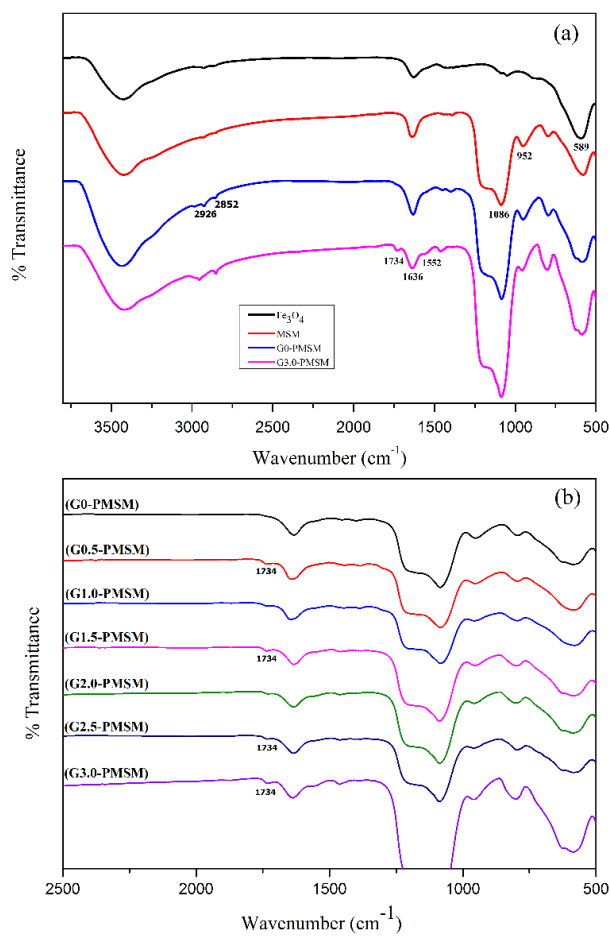

Fig. S1 FT-IR spectra of the preparation of dendrimer-modified magnetic microspheres (a) and different generations of PAMAM on PMSM (b).

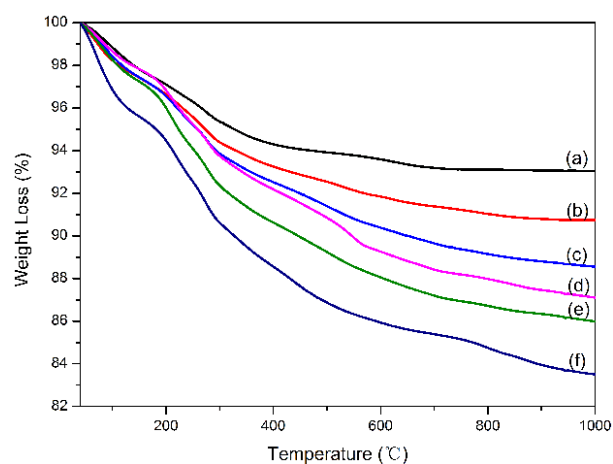

Fig. S2 TGA curves of MSM (a), G0-PMSM (b), G1.0-PMSM (c), G2.0-PMSM (d), G3.0-PMSM (e) and HSA-PMSM (f).
